# Supplementary material
Source: publisher figshare collection journal article supplement (https://frontiersin.figshare.com/ndownloader/files/16267721)
Supplement: Supplementary file [file 16267721]

**Supplementary Table S1:** Breeds and characteristics of Iraqi cattle

| Region                                                                     | Specific Characteristics                                                                                                                           | Weight (kg)                      |
|----------------------------------------------------------------------------|----------------------------------------------------------------------------------------------------------------------------------------------------|----------------------------------|
| Rustaqi (Al-Murrani <i>et al.</i> , 2003; Al-Bayatti <i>et al.</i> , 2016) |                                                                                                                                                    |                                  |
| Central Iraq (Baghdad and Babylon provinces)                               | Brown, black to grey in color, not pigmented skin, small size/male and no hump in female, tolerant to heat stress, endemic diseases and parasites. | 450 kg (male)<br>400 kg (female) |
| Jenoubi (Al-Murrani <i>et al.</i> , 2003)                                  |                                                                                                                                                    |                                  |
| Southern Iraq (Basra, Maysan)                                              | Red and sometimes pied color                                                                                                                       | 325 kg (male)<br>309 kg (female) |
| Karradi (Al-Murrani <i>et al.</i> , 2003)                                  |                                                                                                                                                    |                                  |
| Northern Iraq (Kurdistan)                                                  | Mostly black tend to be brown with light spots                                                                                                     | 300 kg (male)<br>220 kg (female) |
| Sharabi (Al-Murrani <i>et al.</i> , 2003; Maarroof, 2011)                  |                                                                                                                                                    |                                  |
| Northern Iraq (Tigris Valley, North of Mosul)                              | Black and white color with white line dividing all the body.                                                                                       | 400 kg (male)<br>295 kg (female) |
